# Supplementary material for: Magnetic Relaxation Switching Assay Using IFNα-2b-Conjugated Superparamagnetic Nanoparticles for Anti-Interferon Antibody Detection
Source: MDPI journal article supplement (doi:10.3390/bios13060624), 2023-06-05
Supplement: s1 [file s1]

Supplementary Material

# Magnetic Relaxation Switching Assay Using IFN $\alpha$ -2b-Conjugated Superparamagnetic Nanoparticles for Anti-Interferon Antibody Detection

Boris Nikolaev, Ludmila Yakovleva, Viacheslav Fedorov, Natalia Yuditceva, Vyacheslav Ryzhov, Yaroslav Marchenko, Alexander Ischenko, Alexander Zhakhov, Anatoliy Dobrodumov, Stephanie E. Combs, Huile Gao and Maxim Shevtsov

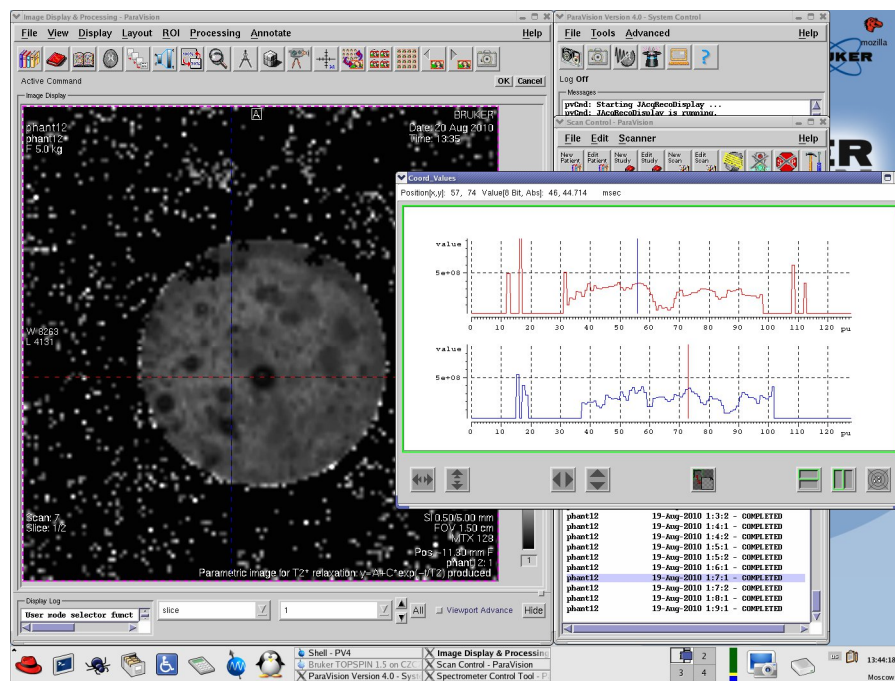

**Figure S1.** Distribution map of relaxation times  $T_2^*$  in the axial section of the gel part of the phantom sample, loaded by SPIONs@IFN $\alpha$ -2b. The inset to the MRI image shows the change in the relaxation times of the elementary volume along the blue and red lines.
